# Supplementary material for: Conventional laboratory housing increases morbidity and mortality in research rodents: results of a meta-analysis
Source: PubMed Central journal article supplement (PMC8756709; doi:10.1186/s12915-021-01184-0), 2022-01-13
Supplement: 12915_2021_1184_MOESM1_ESM.pdf [file 12915_2021_1184_MOESM1_ESM.pdf]

| <b>disease</b>         | <b># papers</b> |
|------------------------|-----------------|
| cardiovascular disease | 23              |
| depression             | 15              |
| cancer                 | 10              |
| viral infection        | 8               |
| asthma                 | 4               |
| anxiety                | 3               |
| stroke                 | 2               |
