# Supplementary material for: Conventional laboratory housing increases morbidity and mortality in research rodents: results of a meta-analysis
Source: PubMed Central journal article supplement (PMC8756709; doi:10.1186/s12915-021-01184-0), 2022-01-13
Supplement: 12915_2021_1184_MOESM8_ESM.pdf [file 12915_2021_1184_MOESM8_ESM.pdf]

| <b>Animal Characteristics</b>                                                                                                    | <b>Housing Characteristics</b>                                                                                                                                                                                                                                                                                                                                                                                             | <b>Disease Characteristics</b>                                                                                                                                      |
|----------------------------------------------------------------------------------------------------------------------------------|----------------------------------------------------------------------------------------------------------------------------------------------------------------------------------------------------------------------------------------------------------------------------------------------------------------------------------------------------------------------------------------------------------------------------|---------------------------------------------------------------------------------------------------------------------------------------------------------------------|
| <ul style="list-style-type: none"> <li>- species</li> <li>- sex</li> <li>- strain</li> <li>- genotype (if transgenic)</li> </ul> | <ul style="list-style-type: none"> <li>- description of conventional housing</li> <li>- description of enriched housing</li> <li>- social status</li> <li>- age animals were differentially housed</li> <li>- length of housing exposure</li> <li>- object rotation/replacement frequency</li> <li>- if enrichment was removed prior to disease induction and for how long</li> <li>- “red flags” (see methods)</li> </ul> | <ul style="list-style-type: none"> <li>- disease model (e.g. transgenic, surgical, dietary etc.)</li> <li>- measures reported</li> <li>- unit of measure</li> </ul> |
