# Supplementary material for: Conventional laboratory housing increases morbidity and mortality in research rodents: results of a meta-analysis
Source: PubMed Central journal article supplement (PMC8756709; doi:10.1186/s12915-021-01184-0), 2022-01-13
Supplement: 12915_2021_1184_MOESM9_ESM.pdf [file 12915_2021_1184_MOESM9_ESM.pdf]

|                               |                                                              |
|-------------------------------|--------------------------------------------------------------|
| <b>cancer</b>                 | SMD = 0.79, 95%CI = 0.62-0.97, z = 8.87, p < 0.0001          |
| <b>cardiovascular disease</b> | SMD = 0.91, 95%CI = 0.56-1.27, z = 5.04, p < 0.0001          |
| <b>stroke</b>                 | SMD = 0.92, 95%CI = 0.64-1.20, z = 6.39, p < 0.0001          |
| <b>anxiety</b>                | SMD = 1.06, 95%CI = 0.71-1.42, z = 5.89, p < 0.0001          |
| <b>depression</b>             | SMD = 1.67, 95%CI = 1.36-1.98, z = 10.70, p < 0.0001         |
| <b>hazard ratios</b>          | hazard ratio = 1.61, 95%CI = 1.31-1.97, z = 4.59, p < 0.0001 |
| <b>median survival</b>        | ROM = 0.92, 95%CI = 0.89-0.96, z = -4.36, p < 0.0001         |
