# Supplementary material for: Conventional laboratory housing increases morbidity and mortality in research rodents: results of a meta-analysis
Source: PubMed Central journal article supplement (PMC8756709; doi:10.1186/s12915-021-01184-0), 2022-01-13
Supplement: 12915_2021_1184_MOESM10_ESM.pdf [file 12915_2021_1184_MOESM10_ESM.pdf]

|                                                  | <b>Test Statistic</b> | <b>p</b>      |
|--------------------------------------------------|-----------------------|---------------|
| <b>species</b>                                   | $F_{1,154} = 0.0991$  | 0.7534        |
| <b>sex</b>                                       | $F_{2,154} = 0.0190$  | 0.9812        |
| <b>social status</b>                             | $F_{2,154} = 0.5127$  | 0.5999        |
| <b>disease</b>                                   | $F_{4,154} = 1.6360$  | 0.1680        |
| <b>measure: infarct volume versus all others</b> | $F_{1,154} = 21.9755$ | < 0.0001      |
| <b>species*sex</b>                               | $F_{2,154} = 1.3099$  | 0.2728        |
| <b>species*social status</b>                     | $F_{2,154} = 0.2547$  | 0.7755        |
| <b>sex*social status</b>                         | $F_{4,154} = 0.5026$  | 0.7339        |
| <b>resource category</b>                         | $F_{3,139} = 1.2245$  | 0.3032        |
| <b>resource category*species</b>                 | $F_{3,139} = 1.1497$  | 0.3314        |
| <b>after removal of 'red flags'</b>              |                       |               |
| <b>species</b>                                   | $F_{1,91} = 0.0465$   | 0.8297        |
| <b>sex</b>                                       | $F_{2,91} = 0.0891$   | 0.9148        |
| <b>social status</b>                             | $F_{2,91} = 0.2655$   | 0.7674        |
| <b>disease</b>                                   | $F_{4,91} = 2.4741$   | <b>0.0498</b> |
| <b>measure: infarct volume versus all others</b> | $F_{1,91} = 16.3696$  | <b>0.0001</b> |
| <b>species*sex</b>                               | $F_{2,91} = 0.6379$   | 0.5307        |
| <b>species*social status</b>                     | $F_{2,91} = 0.6279$   | 0.5360        |
| <b>sex*social status</b>                         | $F_{4,91} = 0.1280$   | 0.9719        |
| <b>resource category</b>                         | $F_{3,83} = 2.8122$   | <b>0.0443</b> |
| <b>resource category*species</b>                 | $F_{3,83} = 1.0025$   | 0.3960        |
