# Supplementary material for: Conventional laboratory housing increases morbidity and mortality in research rodents: results of a meta-analysis
Source: PubMed Central journal article supplement (PMC8756709; doi:10.1186/s12915-021-01184-0), 2022-01-13
Supplement: 12915_2021_1184_MOESM11_ESM.pdf [file 12915_2021_1184_MOESM11_ESM.pdf]

|                                       | <b>Test Statistic</b> | <b>p</b> |
|---------------------------------------|-----------------------|----------|
| <b>species</b>                        | $F_{1,27} = 0.8281$   | 0.3709   |
| <b>sex</b>                            | $F_{2,27} = 0.3501$   | 0.7078   |
| <b>social status</b>                  | $F_{2,27} = 1.4566$   | 0.2508   |
| <b>spontaneous or induced disease</b> | $F_{1,27} = 0.0454$   | 0.8329   |
| <b>species*sex</b>                    | $F_{1,27} = 0.3153$   | 0.5791   |
| <b>species*social status</b>          | $F_{1,27} = 0.2354$   | 0.6315   |
| <b>sex*social status</b>              | $F_{2,27} = 0.5335$   | 0.5926   |
| <b>resource category</b>              | $F_{1,26} = 0.0101$   | 0.9208   |
| <b>after removal of 'red flags'</b>   |                       |          |
| <b>species</b>                        | $F_{1,18} = 0.8237$   | 0.3761   |
| <b>sex</b>                            | $F_{2,18} = 0.2132$   | 0.8100   |
| <b>social status</b>                  | $F_{2,18} = 0.1408$   | 0.8696   |
| <b>spontaneous or induced disease</b> | $F_{1,18} = 0.7598$   | 0.3949   |
| <b>species*sex</b>                    | $F_{1,18} = 0.5018$   | 0.4878   |
| <b>species*social status</b>          | $F_{1,18} = 0.3303$   | 0.5726   |
| <b>sex*social status</b>              | $F_{2,18} = 0.5802$   | 0.5699   |
| <b>resource category</b>              | $F_{1,17} = 0.1804$   | 0.6763   |
