# Supplementary material for: Conventional laboratory housing increases morbidity and mortality in research rodents: results of a meta-analysis
Source: PubMed Central journal article supplement (PMC8756709; doi:10.1186/s12915-021-01184-0), 2022-01-13
Supplement: 12915_2021_1184_MOESM14_ESM.pdf [file 12915_2021_1184_MOESM14_ESM.pdf]

| <b>Resource</b>                         | <b>Author description or Clear Photograph</b>                                                                                                                                                          |
|-----------------------------------------|--------------------------------------------------------------------------------------------------------------------------------------------------------------------------------------------------------|
| space                                   | <ul style="list-style-type: none"> <li>- enriched cage was larger than conventional cage</li> </ul>                                                                                                    |
| shelter/hiding opportunities            | <ul style="list-style-type: none"> <li>- shelters, tubes or huts</li> </ul>                                                                                                                            |
| climbing/3D movement                    | <ul style="list-style-type: none"> <li>- ladders</li> <li>- ramps</li> <li>- multi-tiered cages</li> </ul>                                                                                             |
| extra nesting materials/sleeping places | <ul style="list-style-type: none"> <li>- more nesting material than conventional cage</li> <li>- hammocks</li> <li>- nest boxes</li> </ul>                                                             |
| wheel                                   | <ul style="list-style-type: none"> <li>- running wheel (unlocked)</li> </ul>                                                                                                                           |
| foraging opportunities                  | <ul style="list-style-type: none"> <li>- authors specify or picture shows an opportunity to forage</li> <li>- food was scattered or moved throughout the cage</li> </ul>                               |
| gnawing/chewing opportunities           | <ul style="list-style-type: none"> <li>- authors specify or picture shows gnawing opportunities</li> <li>- given objects designed to permit gnawing (e.g. wood or other chewable materials)</li> </ul> |
| novelty                                 | <ul style="list-style-type: none"> <li>- provision of novel objects</li> <li>- rotation/replacement of objects</li> </ul>                                                                              |
