# Supplementary material for: Conventional laboratory housing increases morbidity and mortality in research rodents: results of a meta-analysis
Source: PubMed Central journal article supplement (PMC8756709; doi:10.1186/s12915-021-01184-0), 2022-01-13

**A**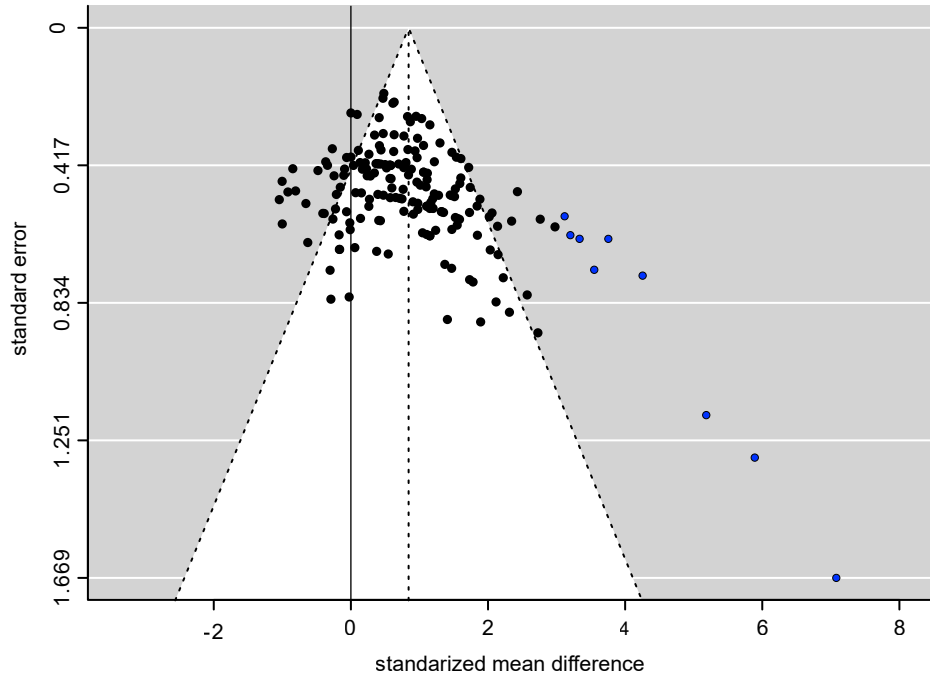**B**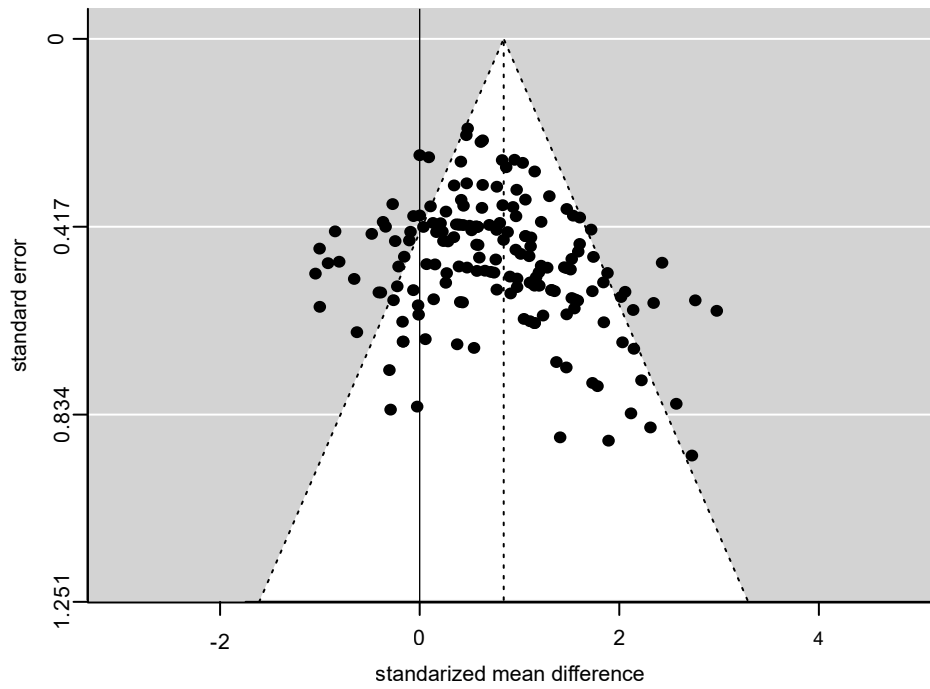

Supplement: 12915_2021_1184_MOESM18_ESM.pdf [file 12915_2021_1184_MOESM18_ESM.pdf]
