# Supplementary material for: Conventional laboratory housing increases morbidity and mortality in research rodents: results of a meta-analysis
Source: PubMed Central journal article supplement (PMC8756709; doi:10.1186/s12915-021-01184-0), 2022-01-13
Supplement: 12915_2021_1184_MOESM20_ESM.pdf [file 12915_2021_1184_MOESM20_ESM.pdf]

| <b>No. of studies</b> | <b>Risk of bias in individual studies</b> | <b>Inconsistency</b>     | <b>Indirectness</b>     | <b>Imprecision</b>     | <b>Publication bias</b> | <b>Housing effect result summary</b>                    | <b>Quality</b> |
|-----------------------|-------------------------------------------|--------------------------|-------------------------|------------------------|-------------------------|---------------------------------------------------------|----------------|
| mortality data (25)   | serious risk of bias                      | no serious inconsistency | no serious indirectness | no serious imprecision | undetected              | hazard ratio = 1.48<br>95% CI = 1.25-1.74<br>p < 0.0001 | High           |
| disease data (157)    | serious risk of bias                      | no serious inconsistency | no serious indirectness | no serious imprecision | detected                | SMD = 0.73<br>95% CI = 0.63-0.84<br>p < 0.0001          | High           |
